# Supplementary material for: Degradation of fluoride in groundwater by electrochemical fixed bed system with bauxite: performance and synergistic catalytic mechanism
Source: Royal Society of Chemistry journal article supplement (doi:10.1039/d4ra01359j), 2024-01-01
Supplement: d4ra01359j1.pdf [file d4ra01359j1.pdf]

## Supporting information

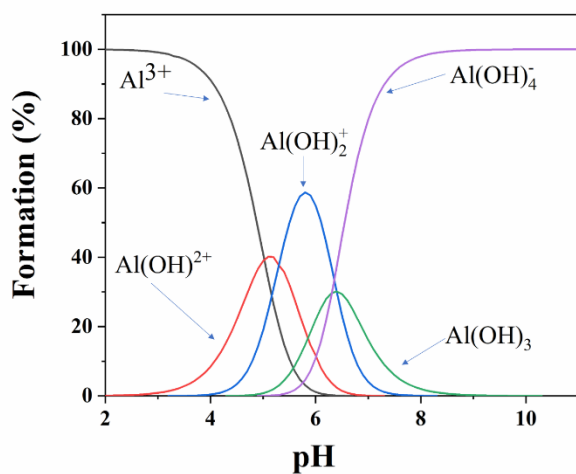

Fig. S1 Fraction-pH diagram for aluminum species in an aqueous solution.  $T = 25\text{ }^\circ\text{C}$ ,  $[\text{Al}^{3+}]_T = 5 \times 10^{-6}\text{ M}$ .

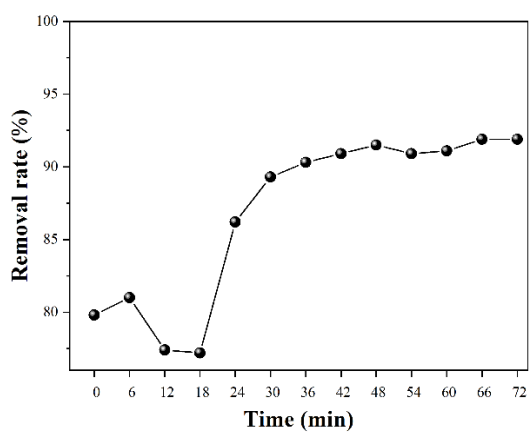

Fig. S2 The temporal evolution of defluorination efficiency in the IE-BA system.
